# Supplementary material for: Hallmarks of glycogene expression and glycosylation pathways in squamous and adenocarcinoma cervical cancer
Source: PeerJ. 2021 Aug 31;9:e12081. doi: 10.7717/peerj.12081 (PMC8415283; doi:10.7717/peerj.12081)
Supplement: Supplemental Information 1 [file peerj-09-12081-s001.xlsx]

## Sheet: Table supp 1
Glycogenes with high expression pattern in cervical cancer
Microarray assay: CC vs normal cervix	RNAseq analysis: AC vs SC
Glycogenes in cervical cancer	Comparison between AC and SC	Screening in all squamous cervical cancer samples
	Glycogenes in AC-A	Glycogenes in SCC-1A	Glycogenes in SCC-3	Glycogenes in SCC-4	Glycogenes in SCC-5	Glycogenes in SCC-6
CHI3L1	ALG8	ALG3	CHST2	ALG3	B4GALT1	ARSB		Glycogenes in gray cells indicate that they can be found in several clusters or conditions. For instance, the high expression of ST6GAL1 is found in cervical cancer and also in AC-A
HEXB	ALG9	B3GALT6	COLGALT1	ALG5	C1GALT1	B3GALNT1
PIGC	ALG11	B3GAT3	DSE	ALG8	CHST11	B3GNT2
PIGN	ALG12	B4GALT2	EXT1	AMDHD2	CHST15	B4GALT6
SMPD3	AMY1A	B4GALT7	EXT2	ARSA	CSGALNACT1	CHST5
ST6GAL1	AMY2A	DAD1	GALNT18	B3GALT6	GALNT2	CHSY3
	AMY2B	DPM2		B3GAT3	GFPT2	CTBS
	ARSD	DPM3		B4GALT2	ST3GAL4	DPY19L1
	ARSE	EDEM2		B4GALT7	UAP1	DSEL
	B3GALT5	GALK1		CHPF2		EXTL1
	B3GAT1	GNPTG		CHST12		EXTL2
	B3GNT3	GPAA1		DAD1		FUT4
	B3GNT7	GUSB		DPM2		GALNT13
	CHST4	HEXA		DPM3		GALNT15
	CHST5	HEXD		GALK1		GALNT17
	CHST6	MAN1B1		GNPTG		GCNT1
	CYB5R3	MANBAL		GPAA1		GFPT1
	DPAGT1	NAGLU		GUSB		GLCE
	FUT4	NAGPA		HEXA		GLT8D2
	GAL3ST1	NT5M		MAN1B1		GNS
	GAL3ST2	OST4		MOGS		GXYLT1
	GALNT12	PIGQ		NAGLU		GXYLT2
	GALNT4	PIGU		NAGPA		GYG1
	GALNT6	PMM1		NANS		HS2ST1
	GALNT9	POMT1		OST4		KL
	GALNTL6	RFNG		PIGQ		LFNG
	GBA3	RPN1		PMM2		MAN1A1
	GCNT2	RPN2		POMT1		MAN2B2
	GCNT3	ST3GAL3		RFNG		MANBA
	GFPT1	SUMF2		RPN1		PIGG
	GLB1L			SUMF2		PIGK
	GMDS			TSTA3		POFUT1
	GNE					ST3GAL2
	GYG2					ST6GAL2
	MAN2B2					ST6GALNAC3
	MANBA					ST6GALNAC5
	MGAT3					ST8SIA2
	NAGA					SULF1
	NEU4					TUSC3
	PIGG					UGGT1
	POFUT2					UGGT2
	PYGB					UXS1
	ST3GAL4
	ST6GAL1
	ST6GALNAC1
	ST6GALNAC4
	ST6GALNAC6
	STT3A
	SULT1C2
	TREH
	UGT2B7
