# Supplementary material for: Hallmarks of glycogene expression and glycosylation pathways in squamous and adenocarcinoma cervical cancer
Source: PeerJ. 2021 Aug 31;9:e12081. doi: 10.7717/peerj.12081 (PMC8415283; doi:10.7717/peerj.12081)
Supplement: Supplemental Information 2 [file peerj-09-12081-s002.xlsx]

## Sheet: Table supp 2
Glycogenes with low expression pattern in cervical cancer
Microarray assay: CC vs normal cervix	RNAseq analysis: AC vs SC
Glycogenes in cervical cancer	Comparison between AC and SC			Screening in all squamous cervical cancer samples
	Glycogenes with low expression in both AC and SC	Glycogenes in AC-B	Glycogenes in AC-C	Glycogenes with low expression pattern in all SC samples	Glycogenes in SCC-1B	Glycogenes in SCC-2	Glycogenes in SCC-4
CHST12	G6PC	A4GALT	ARSF	CHIA	ALG10	AMDHD2	ALG10		Glycogenes in gray cells indicate that they can be found in several clusters or conditions. For instance, the low expression of GYS1 is found in cervical cancer and also in AC-B
CTBS	GBA3	B3GNT9	B3GALNT2	GLT6D1	B3GAT2	B3GAT1	B3GAT2
GALNT11	LYZL1	B4GALNT1	B3GNT5	SPACA3	CHSY1	CHI3L1	B4GALNT3
GYS1	LYZL6	B4GALNT2	B3GNT8	FUT9	CSGALNACT2	CHI3L2	CHSY1
HAS3	NDST4	CERCAM	CHST7	B3GALT1	EDEM3	CHIT1	CSGALNACT2
HPSE	SPAM1	CHPF	DSE	GALNTL5	FKTN	CHST11	EDEM3
HYAL2	ST8SIA3	CHST11	EXT1	NEU2	FUT11	CHST13	FKTN
UGT2B28	SULT1B1	CHST15	FUT1	UGT2B15	GALNT10	CHST15	FUT11
UGT2B4	SULT2A1	CHST2	GAL3ST4	UGT2A3	GNPTAB	FUCA1	GALNT3
	UGT1A1	CHST3	GCNT4	UGT2B7	GXYLT1	FUT7	GANC
	UGT1A10	COLGALT1	GM2A	LYZL4	MAN1A2	GBGT1	GCNT4
	UGT1A3	EXT2	HAS3		MAN2A1	GFPT2	GNPTAB
	UGT1A4	EXTL3	HK1		MANEA	GLT1D1	IDS
	UGT1A5	FKRP	HPSE		MGAT5	GNS	LCTL
	UGT1A7	GALNS	HS3ST4		NEU3	HAS1	MAN1A2
	UGT2B10	GALNT1	HS3ST6		PGM3	HEXB	MAN2A1
	UGT2B11	GALNT18	HS6ST1		POMK	HK3	MANEA
	UGT2B4	GFPT2	IDS		STT3B	HS3ST2	MGAT5
	UGT2B28	GYS1	LARGE2		UGCG	LYZ	NEU3
	UGT3A1	HAS1	NAGK			MAN2B1	PIGN
		HAS2	NDST1			MFNG	POMK
		MGAT5B	PGAP1			MGAM	STT3B
		SULF2	PGM2			MGAT1	UGCG
			PIGN			MGAT4A
			PIGX			NAGK
			POGLUT1			RENBP
			PRKAB2			ST3GAL5
			PYGL			ST8SIA1
			ST6GALNAC2			ST8SIA4
			TPST1			SULT1C2
			TPST2			TPST2
			UST
			XXYLT1
